# Supplementary material
Source: PubMed Central journal article supplement (PMC8765438)
Supplement: aac.01807-21-s0001.pdf [file aac.01807-21-s0001.pdf]

**Table S1. KL and OCL assignments for all isolates in the diverse panel**

| MRSN ID | GenBank Accession | Assembly number | Previously assigned KL | Confirmed KL <sup>1</sup> | Previously assigned OCL | Confirmed OCL <sup>1</sup> |
|---------|-------------------|-----------------|------------------------|---------------------------|-------------------------|----------------------------|
| 6541    | VHEK00000000      | GCA_006492195.1 | KL1                    | KL1-v*                    | OCL1                    | OCL1                       |
| 7213    | VHEE00000000      | GCA_006492065.1 | KL1                    | KL1                       | OCL1                    | OCL1                       |
| 960     | VHDR00000000      | GCA_006491965.1 | KL1                    | KL1-v*                    | OCL1                    | OCL1                       |
| 31196   | VHFU00000000      | GCA_006491855.1 | KL1                    | KL1-v* + GI-1             | OCL1                    | OCL1                       |
| 11695   | VHHI00000000      | GCA_006493765.1 | KL1                    | KL1-v <sup>2</sup>        | OCL1                    | OCL1                       |
| 1551    | VHGQ00000000      | GCA_006493835.1 | KL108                  | KL108                     | OCL2                    | OCL2                       |
| 31461   | VHFT00000000      | GCA_006491865.1 | KL11                   | KL11                      | OCL8                    | OCL8                       |
| 32875   | VHFD00000000      | GCA_006492475.1 | KL11                   | KL11                      | OCL8                    | OCL8                       |
| 31937   | VHFP00000000      | GCA_006492985.1 | KL116                  | KL116                     | OCL6                    | OCL6                       |
| 7067    | VHEJ00000000      | GCA_006492575.1 | KL12                   | KL12                      | OCL2                    | OCL2                       |
| 15049   | VHGW00000000      | GCA_006494155.1 | KL12                   | KL12                      | OCL2                    | OCL2-v*                    |
| 15075   | VHGU00000000      | GCA_006494055.1 | KL46                   | KL121                     | OCL6                    | OCL6                       |
| 11663   | VHHK00000000      | GCA_006494665.1 | KL125                  | KL125                     | OCL7                    | OCL7                       |
| 32865   | VHFF00000000      | GCA_006492735.1 | KL125                  | KL125                     | OCL5                    | OCL5                       |
| 32892   | VHFC00000000      | GCA_006492425.1 | KL125                  | KL125                     | OCL7                    | OCL7                       |
| 1171    | VHHG00000000      | GCA_006493925.1 | KL13                   | KL13                      | OCL1                    | OCL1-v*                    |
| 32104   | VHFL00000000      | GCA_006492805.1 | KL13                   | KL13                      | OCL5                    | OCL5                       |
| 32842   | VHFG00000000      | GCA_006492855.1 | KL8                    | KL136                     | OCL2                    | OCL2                       |
| 7460    | VHEA00000000      | GCA_006492615.1 | KL14                   | KL14                      | OCL6                    | OCL6                       |
| 31523   | VHFR00000000      | GCA_006492335.1 | KL14                   | KL14                      | OCL6                    | OCL6                       |
| 31915   | VHFQ00000000      | GCA_006492315.1 | KL14                   | KL14                      | OCL6                    | OCL6                       |
| 32304   | VHFI00000000      | GCA_006492945.1 | KL14                   | KL14                      | OCL7                    | OCL15                      |
| 480561  | VHEQ00000000      | GCA_006492265.1 | KL14                   | KL14                      | OCL6                    | OCL6                       |
| 14193   | VHGX00000000      | GCA_006494215.1 | KL19                   | KL146                     | OCL1                    | OCL1                       |
| 489678  | VHEN00000000      | GCA_006492055.1 | KL15                   | KL147                     | OCL5                    | OCL5-v <sup>4</sup>        |
| 30000   | VHGB00000000      | GCA_006493705.1 | KL15                   | KL15                      | OCL7                    | OCL7                       |
| 30896   | VHFZ00000000      | GCA_006494075.1 | KL15                   | KL15                      | OCL1                    | OCL1                       |
| 351162  | VHEX00000000      | GCA_006492905.1 | KL50                   | KL150                     | OCL6                    | OCL6                       |
| 7153    | VHEF00000000      | GCA_006492295.1 | novel                  | KL151                     | OCL5                    | OCL5                       |
| 15574   | VHGP00000000      | GCA_006494565.1 | novel                  | KL152                     | OCL6                    | OCL6                       |
| 4943    | VHEM00000000      | GCA_006492305.1 | novel                  | KL153                     | OCL1                    | OCL1                       |
| 10372   | VHHM00000000      | GCA_006493855.1 | novel                  | KL154                     | OCL4                    | OCL4                       |
| 21660   | VHGL00000000      | GCA_006494015.1 | novel                  | KL155                     | OCL1                    | OCL1                       |
| 11816   | VHHE00000000      | GCA_006494285.1 | novel                  | KL156                     | OCL6                    | OCL6                       |
| 15093   | VHGS00000000      | GCA_006494575.1 | novel                  | KL157                     | OCL6                    | OCL6                       |
| 32076   | VHFM00000000      | GCA_006493005.1 | novel                  | KL158                     | OCL9                    | OCL9                       |
| 1187    | VHHC00000000      | GCA_006494255.1 | KL16                   | KL16                      | OCL7                    | OCL7                       |
| 3360    | VHEZ00000000      | GCA_006492795.1 | KL18                   | KL18                      | OCL3                    | OCL3                       |
| 11703   | VHHH00000000      | GCA_006494005.1 | KL18                   | KL18-v*                   | OCL1                    | OCL1                       |
| 32108   | VHFK00000000      | GCA_006492525.1 | KL18                   | KL18                      | OCL3                    | OCL3                       |
| 843     | VH DU00000000     | GCA_006492125.1 | KL19                   | KL19 + GI-1               | OCL1                    | OCL1                       |
| 3874    | VHET00000000      | GCA_006492705.1 | KL19                   | KL19 + GI-1               | OCL1                    | OCL1                       |
| 30945   | VHFW00000000      | GCA_006493045.1 | KL19                   | KL19 + GI-1               | OCL1                    | OCL1                       |
| 3692    | VHEU00000000      | GCA_006492785.1 | KL2                    | KL2                       | OCL6                    | OCL6                       |
| 7431    | VHEC00000000      | GCA_006492385.1 | KL2                    | KL2                       | OCL1                    | OCL1                       |
| 7735    | VHDV00000000      | GCA_006492865.1 | KL2                    | KL2                       | OCL1                    | OCL1                       |
| 30909   | VH FY00000000     | GCA_006491885.1 | KL2                    | KL2                       | OCL6                    | OCL6                       |
| 31947   | VHFN00000000      | GCA_006492775.1 | KL2                    | KL2                       | OCL6                    | OCL6                       |
| 2821    | VHGE00000000      | GCA_006493845.1 | KL20                   | KL20                      | OCL4                    | OCL4                       |
| 14237   | VHGY00000000      | GCA_006494225.1 | KL32                   | KL200-v*                  | OCL7                    | OCL15                      |
| 4484    | VHER00000000      | GCA_006492085.1 | KL21                   | KL21                      | OCL5                    | OCL5                       |
| 1174    | VHHF00000000      | GCA_006493655.1 | KL22                   | KL22                      | OCL3                    | OCL3-v*                    |
| 14427   | VHGX00000000      | GCA_006494175.1 | KL22                   | KL22                      | OCL1                    | OCL1                       |
| 423159  | VHES00000000      | GCA_006492625.1 | KL22                   | KL22-v*                   | novel                   | OCL3-v*                    |
| 7113    | VHEI00000000      | GCA_006492505.1 | KL23                   | KL23                      | OCL5                    | OCL13                      |
| 7725    | VHDW00000000      | GCA_006492405.1 | KL23                   | KL23                      | OCL6                    | OCL6                       |
| 11669   | VHHJ00000000      | GCA_006493685.1 | KL24                   | KL24 + GI-2               | OCL7                    | OCL7                       |
| 21681   | VH GK00000000     | GCA_006658595.1 | KL24                   | KL24 + GI-2               | OCL7                    | OCL7                       |
| 959     | VHDS00000000      | GCA_006491985.1 | KL25                   | KL25                      | OCL2                    | OCL2                       |
| 11224   | VHHL00000000      | GCA_006493645.1 | KL25                   | KL25                      | OCL1                    | OCL1                       |
| 25547   | VHGF00000000      | GCA_006493745.1 | KL25                   | KL25                      | OCL1                    | OCL1                       |
| 15070   | VHGV00000000      | GCA_006494115.1 | KL28                   | KL28                      | OCL7                    | OCL7                       |
| 15129   | VHGR00000000      | GCA_006494085.1 | KL3                    | KL3                       | OCL2                    | OCL2                       |
| 29999   | VHGC00000000      | GCA_006493955.1 | KL31                   | KL31                      | OCL6                    | OCL6                       |

|        |              |                 |       |                    |       |         |
|--------|--------------|-----------------|-------|--------------------|-------|---------|
| 7251   | VHED00000000 | GCA_006492175.1 | KL32  | KL32               | OCL6  | OCL6-v* |
| 7576   | VHDY00000000 | GCA_006492515.1 | KL32  | KL32               | OCL6  | OCL6    |
| 1196   | VHHB00000000 | GCA_006494265.1 | KL33  | KL33               | OCL1  | OCL1    |
| 7137   | VHEG00000000 | GCA_006492635.1 | KL37  | KL37               | OCL7  | OCL7    |
| 31159  | VHFV00000000 | GCA_006494615.1 | KL37  | KL37               | OCL6  | OCL6    |
| 19482  | VHGM00000000 | GCA_006493735.1 | KL4   | KL4-v <sup>3</sup> | OCL10 | OCL10   |
| 337038 | VHEY00000000 | GCA_006492395.1 | KL40  | KL40               | OCL2  | OCL2    |
| 32142  | VHFJ00000000 | GCA_006492215.1 | KL41  | KL41               | OCL5  | OCL5    |
| 3658   | VHEV00000000 | GCA_006492495.1 | KL42  | KL42-v*            | OCL6  | OCL6    |
| 32797  | VHFH00000000 | GCA_006492965.1 | KL42  | KL42               | OCL6  | OCL6    |
| 30885  | VHGA00000000 | GCA_006493945.1 | KL45  | KL45               | OCL6  | OCL6    |
| 480622 | VHEP00000000 | GCA_006492585.1 | KL45  | KL45               | OCL5  | OCL5    |
| 15088  | VHGT00000000 | GCA_006493915.1 | KL47  | KL47               | OCL5  | OCL5    |
| 918    | VHDT00000000 | GCA_006492155.1 | KL49  | KL49               | OCL1  | OCL1    |
| 1311   | VHHA00000000 | GCA_006494165.1 | KL49  | KL49               | OCL3  | OCL3    |
| 7124   | VHEH00000000 | GCA_006492375.1 | KL49  | KL49               | OCL2  | OCL2    |
| 16880  | VHGO00000000 | GCA_006494585.1 | KL49  | KL49               | OCL2  | OCL2    |
| 30912  | VHFX00000000 | GCA_006492715.1 | KL50  | KL50               | OCL6  | OCL6    |
| 22112  | VHGJ00000000 | GCA_006493975.1 | KL52  | KL52               | OCL6  | OCL6    |
| 32915  | VHFB00000000 | GCA_006492925.1 | KL52  | KL52               | OCL1  | OCL1    |
| 5969   | VHEL00000000 | GCA_006491955.1 | KL57  | KL57               | OCL5  | OCL5-v* |
| 31468  | VHFS00000000 | GCA_006491875.1 | KL58  | KL58               | OCL6  | OCL6    |
| 7521   | VHDZ00000000 | GCA_006492165.1 | KL6   | KL6                | OCL1  | OCL1    |
| 17493  | VHGN00000000 | GCA_006494065.1 | KL6   | KL6-v*             | OCL1  | OCL1    |
| 351524 | VHEW00000000 | GCA_006492685.1 | novel | KL69               | OCL7  | OCL7    |
| 29908  | VHGD00000000 | GCA_006493755.1 | KL7   | KL7                | OCL1  | OCL1    |
| 7690   | VHDX00000000 | GCA_006491975.1 | KL8   | KL8                | OCL2  | OCL2    |
| 31942  | VHFO00000000 | GCA_006493035.1 | KL81  | KL81-v*            | OCL6  | OCL6    |
| 24603  | VHGG00000000 | GCA_006493875.1 | KL83  | KL83               | OCL5  | OCL5-v* |
| 334    | VHFA00000000 | GCA_006492245.1 | KL9   | KL9                | OCL1  | OCL1    |
| 1183   | VHHD00000000 | GCA_006494305.1 | KL9   | KL9                | OCL2  | OCL2    |
| 7446   | VHEB00000000 | GCA_006492885.1 | KL9   | KL9                | OCL6  | OCL6    |
| 23390  | VHGI00000000 | GCA_006658565.1 | KL9   | KL9                | OCL7  | OCL7    |
| 24008  | VHGH00000000 | GCA_006493815.1 | KL9   | KL9                | OCL1  | OCL1    |
| 32866  | VHFE00000000 | GCA_006492675.1 | KL9   | KL9                | OCL1  | OCL1    |
| 489669 | VHEO00000000 | GCA_006492075.1 | KL9   | KL9                | OCL1  | OCL1    |

<sup>1</sup> '-v' denotes 'variant locus' as sequence is found in >1 contig with overhanging sequence at break site matching an IS sequence. '-v\*' denotes 'possible variant locus' as sequence is found in >1 contig though no IS sequence is found.

<sup>2</sup> ISAba1 interrupting *atr1* gene

<sup>3</sup> ISAba26 interrupting *gne1* gene

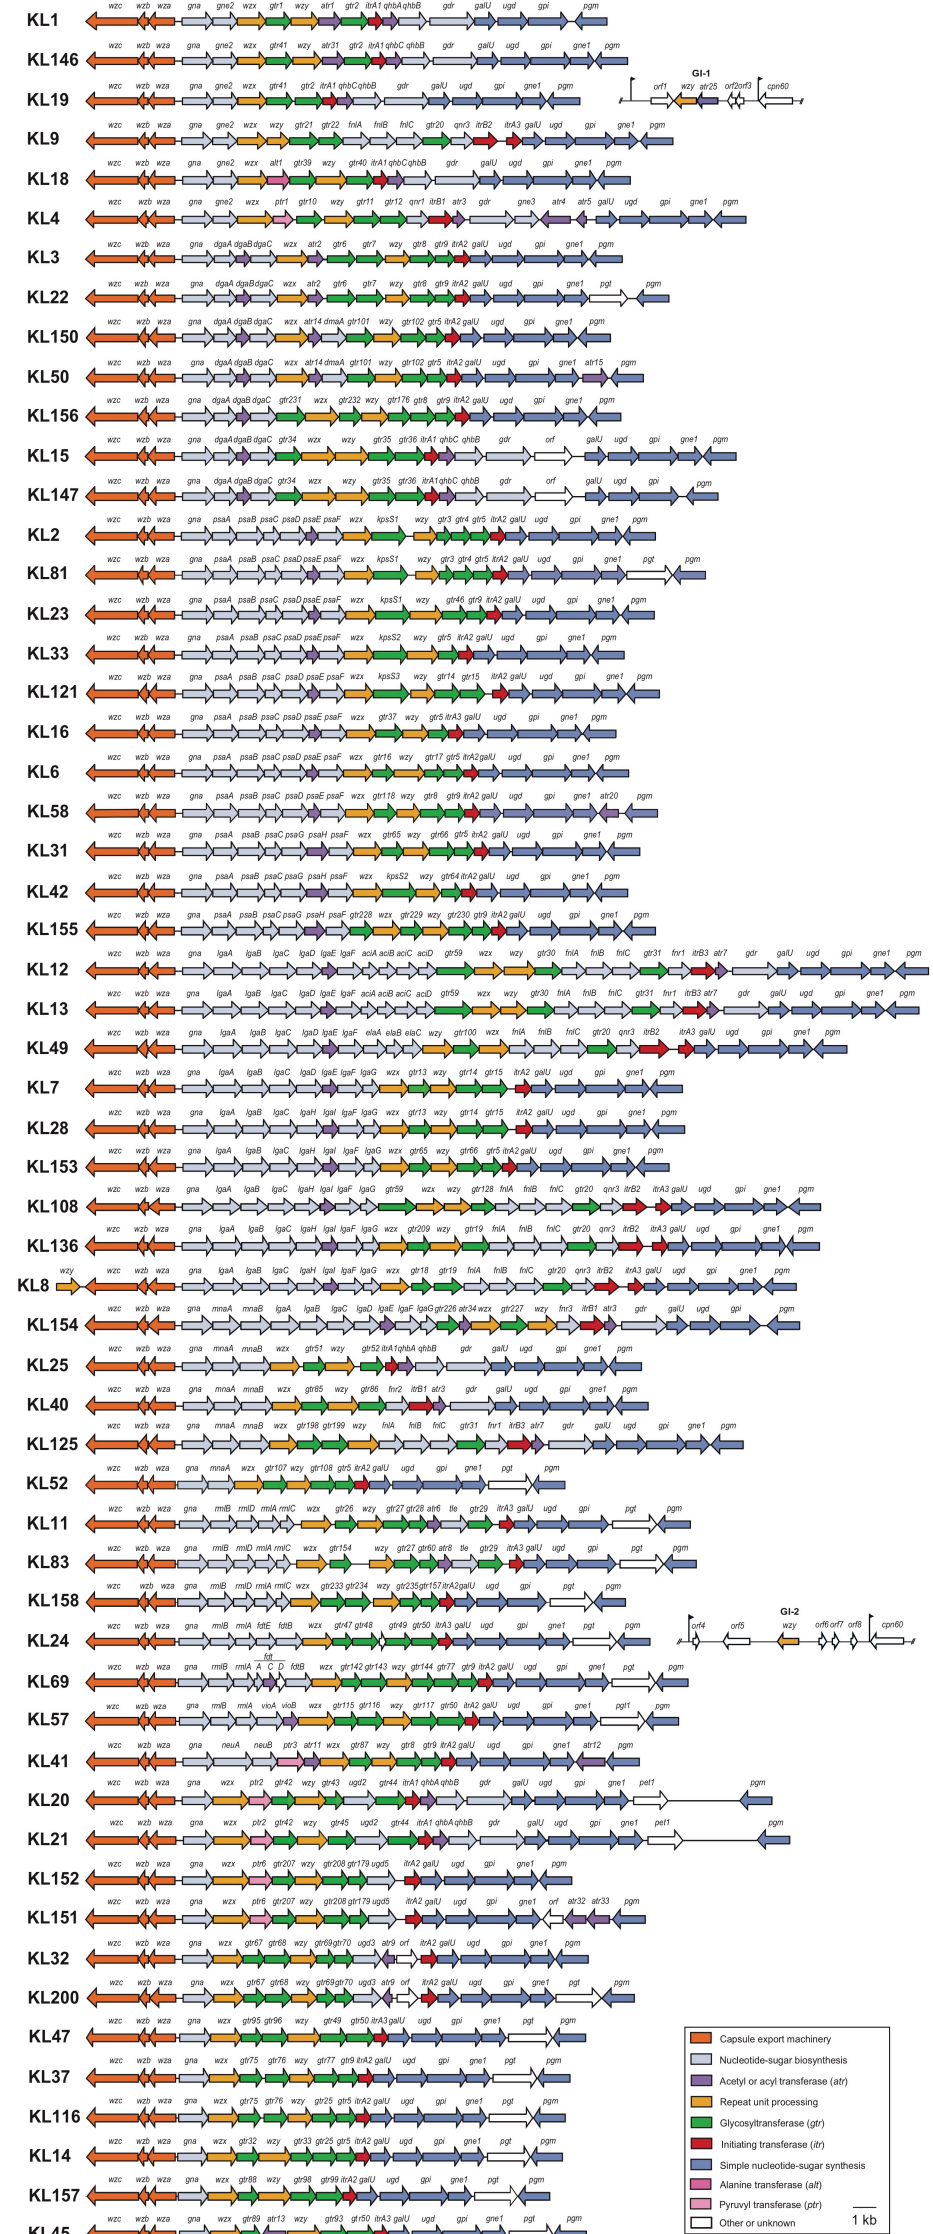

**Figure S1. Organisation of all KL gene clusters identified in the diverse panel**

## Group A

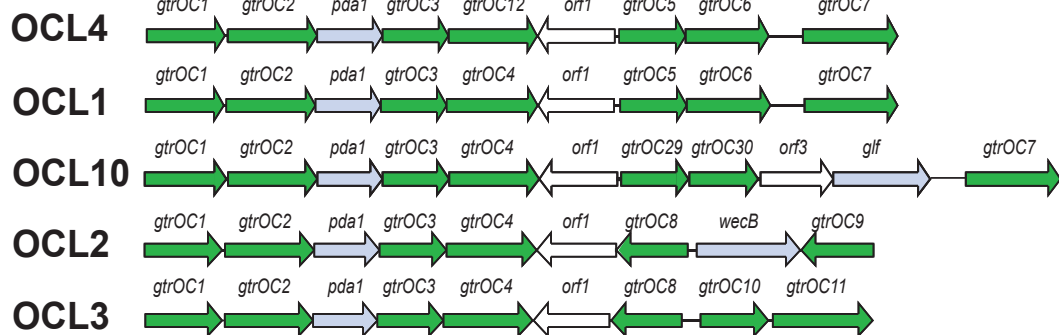

## Group B

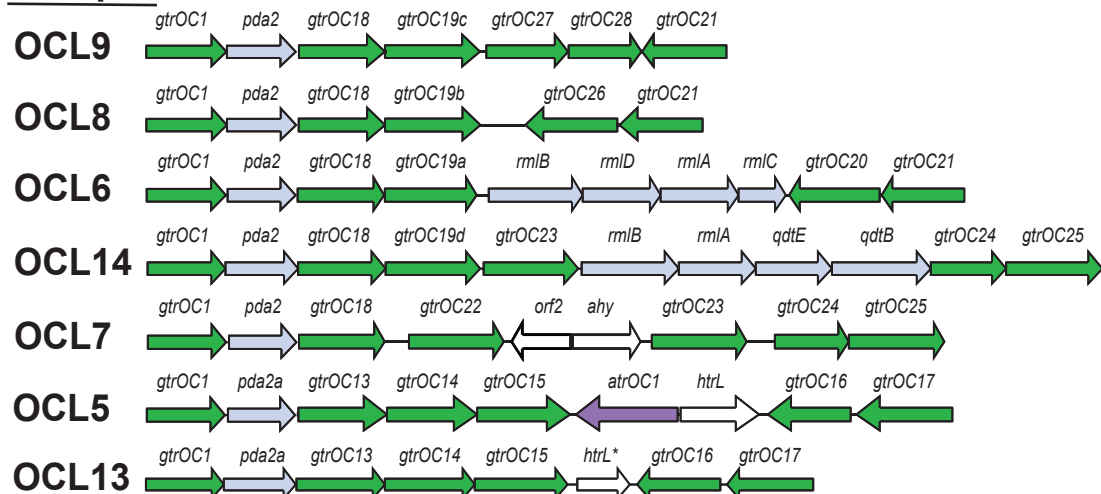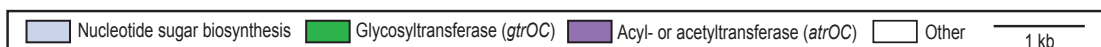

Figure S2. Organisation of all OCL gene clusters identified in the diverse panel
